# Supplementary material
Source: MDPI journal article supplement (https://www.mdpi.com/2073-4352/14/1/87)
Supplement: s1 [file s1]

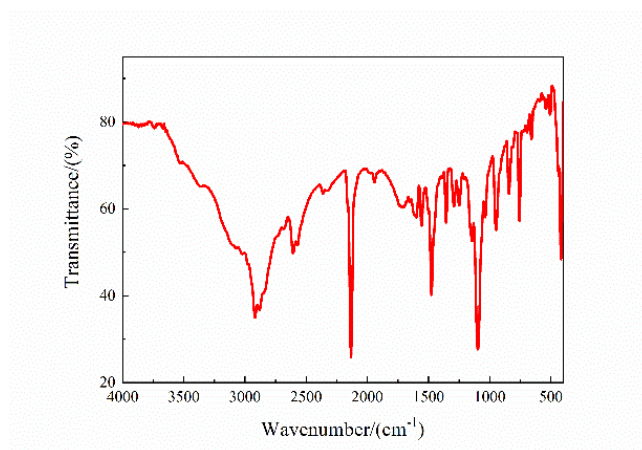

**Figure S1.** IR spectrum of compound **1**.

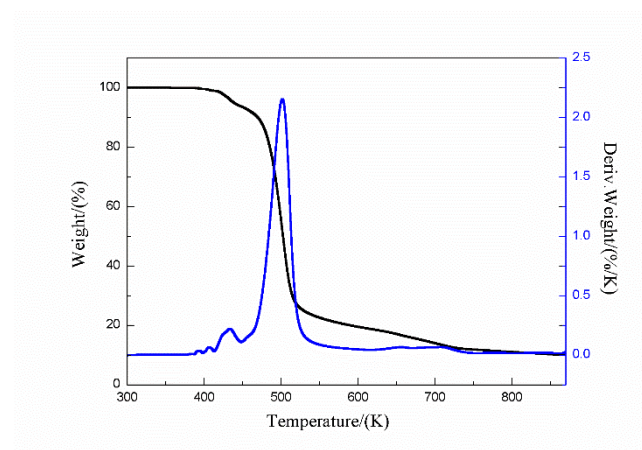

**Figure S2.** TG and DTA curves of compound **1**.

**Table S2.** Hydrogen bond N-H...O geometry (Å,°) for compound.

| D-H...A                                           | d(D...H)Å | d(H...A)Å | d(D...A)Å | D-H...A(°) |
|---------------------------------------------------|-----------|-----------|-----------|------------|
| 100 K                                             |           |           |           |            |
| N <sub>1</sub> -H <sub>1A</sub> ...O <sub>1</sub> | 0.910     | 2.554     | 2.832     | 98.290     |
| N <sub>1</sub> -H <sub>1B</sub> ...O <sub>2</sub> | 0.910     | 1.979     | 2.850     | 159.617    |
| N <sub>1</sub> -H <sub>1C</sub> ...O <sub>3</sub> | 0.911     | 3.015     | 3.188     | 92.573     |
| N <sub>1</sub> -H <sub>1A</sub> ...O <sub>3</sub> | 0.910     | 2.175     | 3.014     | 153.022    |
| N <sub>4</sub> -H <sub>4A</sub> ...O <sub>4</sub> | 0.887     | 1.828     | 2.704     | 168.82     |
| O <sub>4</sub> -H <sub>4C</sub> ...O <sub>4</sub> | 0.829     | 2.171     | 2.489     | 102.68     |
| O <sub>4</sub> -H <sub>4B</sub> ...N <sub>2</sub> | 0.869     | 1.888     | 2.744     | 167.59     |
| N <sub>1</sub> -H <sub>1C</sub> ...N <sub>3</sub> | 0.910     | 1.931     | 2.776     | 153.61     |
| 296 K                                             |           |           |           |            |
| N <sub>1</sub> -H <sub>1A</sub> ...O <sub>1</sub> | 0.890     | 2.595     | 3.220     | 128.008    |
| N <sub>1</sub> -H <sub>1B</sub> ...O <sub>1</sub> | 0.891     | 2.249     | 3.092     | 157.647    |
| N <sub>1</sub> -H <sub>1A</sub> ...O <sub>2</sub> | 0.890     | 1.997     | 2.844     | 158.524    |
| N <sub>1</sub> -H <sub>1B</sub> ...O <sub>3</sub> | 0.891     | 2.526     | 2.861     | 102.982    |
| N <sub>3</sub> -H <sub>3A</sub> ...O <sub>4</sub> | 0.826     | 1.935     | 2.732     | 161.66     |

|             |       |       |       |        |
|-------------|-------|-------|-------|--------|
| O4-H4A...O4 | 0.848 | 2.140 | 2,479 | 103.43 |
| O4-H4B...N2 | 0.850 | 1.902 | 2.715 | 159.78 |
| N1-H1C...N4 | 0.890 | 1.950 | 2.761 | 150.75 |

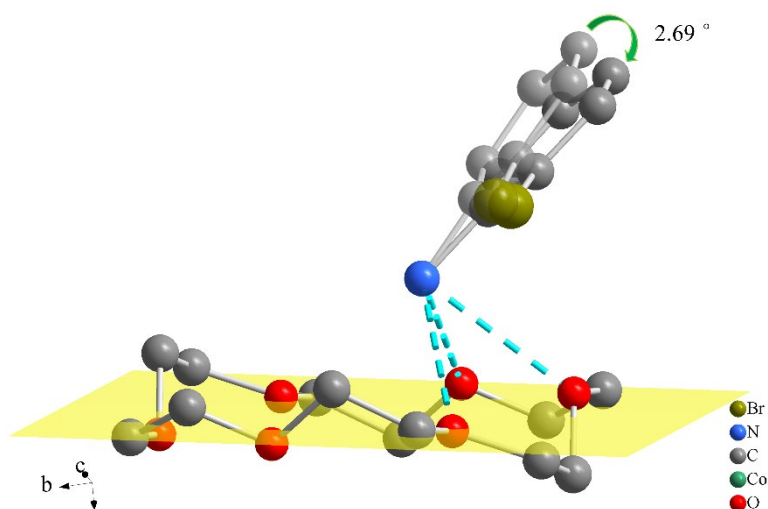

**Figure S3.** Swing diagram of crown ether cation complex o-BrAH of compound **1** at room and low temperature.

Through the information in Table 2, it can be concluded that the N-H...O type hydrogen bond is formed between the N atom in the (o-BrAH)<sup>+</sup> ion and the oxygen atom in the 18-crown-6. The 18-crown-6 and the (o-BrAH)<sup>+</sup> ion form two planes with an angle. The 18-crown-6 is considered as a planar body, and the (o-BrAH)<sup>+</sup> ions are also formed into a plane. It was found that the dihedral angle formed by these two planes changed from 40.83 ° at room temperature to 38.14 ° at low temperature, with a change of 7.05 %, indicating that this change would also lead to a certain physical property change of compound **1**.

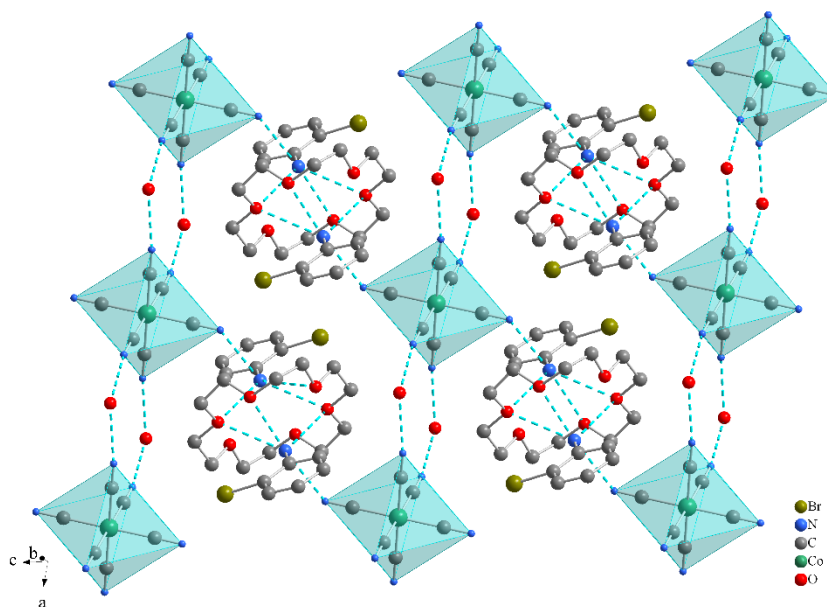

**Figure S4.** *ac* planar graph of compound **1**.

In the *a*-axis direction,  $[\text{H}_2\text{Co}(\text{CN})_6]$  is linked to two water molecules through the hydrogen bond of  $\text{N}-\text{H}\cdots\text{O}$  to form a chain structure. In the *c*-axis direction, it is formed by forming a supramolecular group with 18-crown-6 and  $(\text{o-BrAH})^+$  ions through the hydrogen bond link of  $\text{N}-\text{H}\cdots\text{N}$ , so that compound **1** forms a more stable two-dimensional planar structure in the *ac* plane.

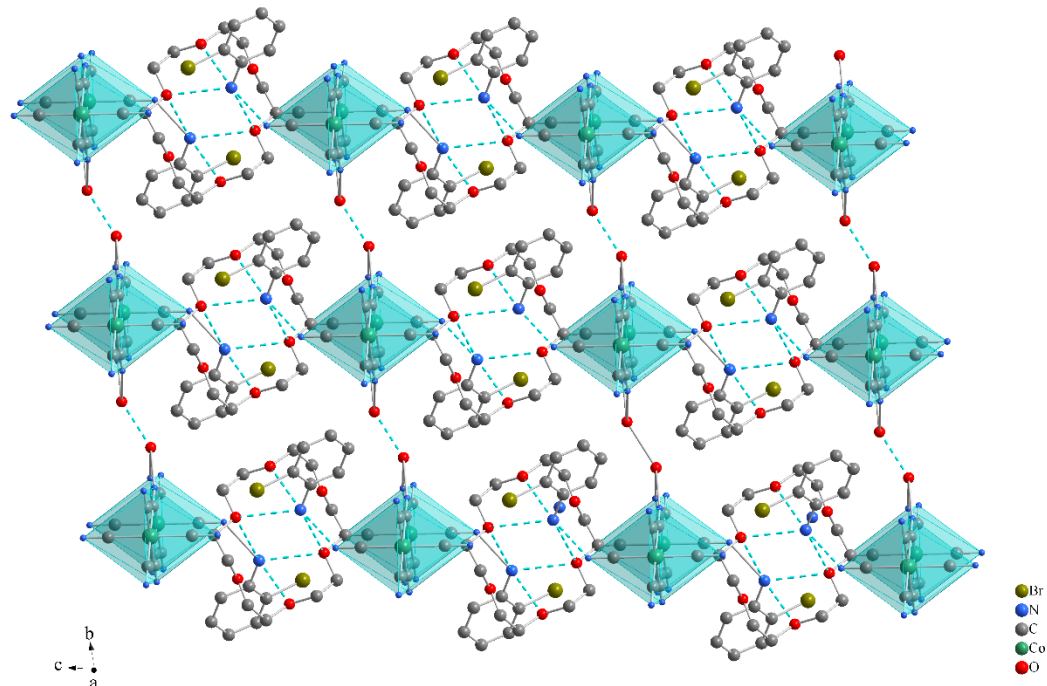

**Figure S5.** *bc* planar graph of compound **1**.

This is a two-dimensional structure diagram of compound **1** *bc* plane. Compound **1** forms a one-dimensional chain structure on the *c*-axis as shown in the above diagram, while the hydrogen bond type on the *b*-axis is  $\text{N}-\text{H}\cdots\text{O}$  as the *a*-axis, but unlike the *a*-axis, it is connected by the lower  $[\text{H}_2\text{Co}(\text{CN})_6]$  and water molecules and then combined with the upper  $[\text{H}_2\text{Co}(\text{CN})_6]$  in the lower row to form a one-dimensional chain structure. It is proved that the compound forms a relatively stable three-dimensional network structure through intermolecular forces in the crystal cell.
